# Supplementary material for: Quasi-two-dimensional β-gallium oxide solar-blind photodetectors with ultrahigh responsivity
Source: Royal Society of Chemistry journal article supplement (doi:10.1039/c6tc02467j), 2016-01-01
Supplement: c6tc02467j1.pdf [file c6tc02467j1.pdf]

### Supporting information

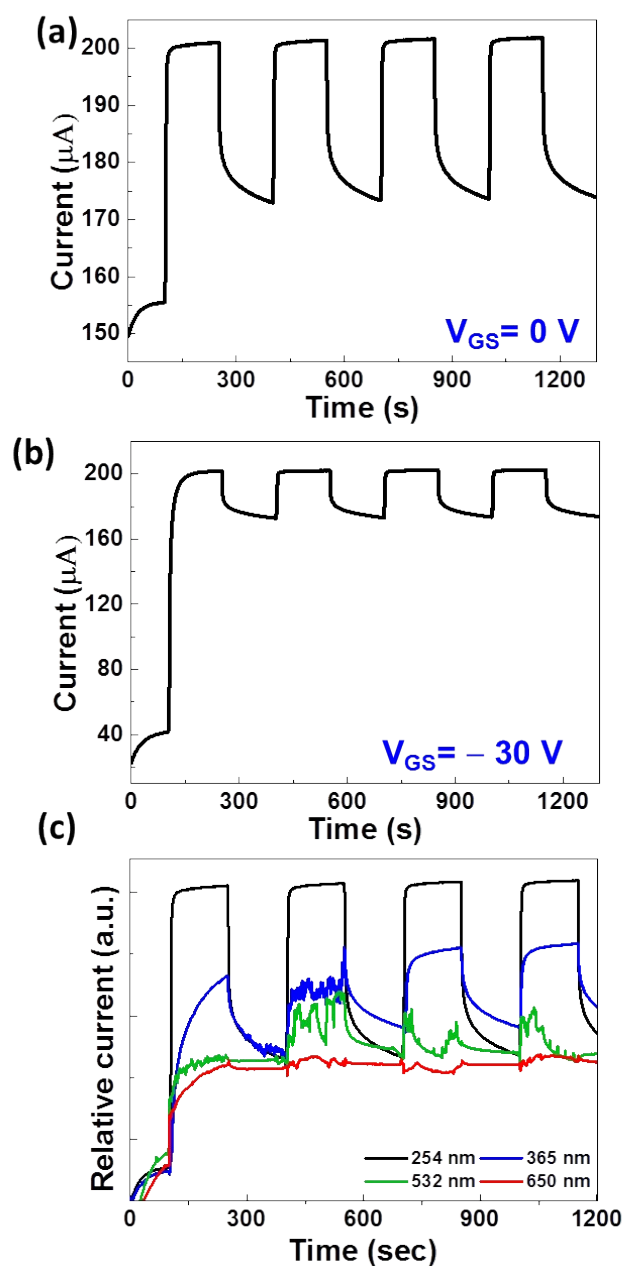

**Figure S1** Time-dependent photoresponse of the fabricated photodetector different applied bias of 0 V (a) and  $-30 \text{ V}$  (b). (c) Time-dependent photoresponse of the fabricated photodetector under various illumination conditions (254, 365, 532 and 650 nm light exposure)

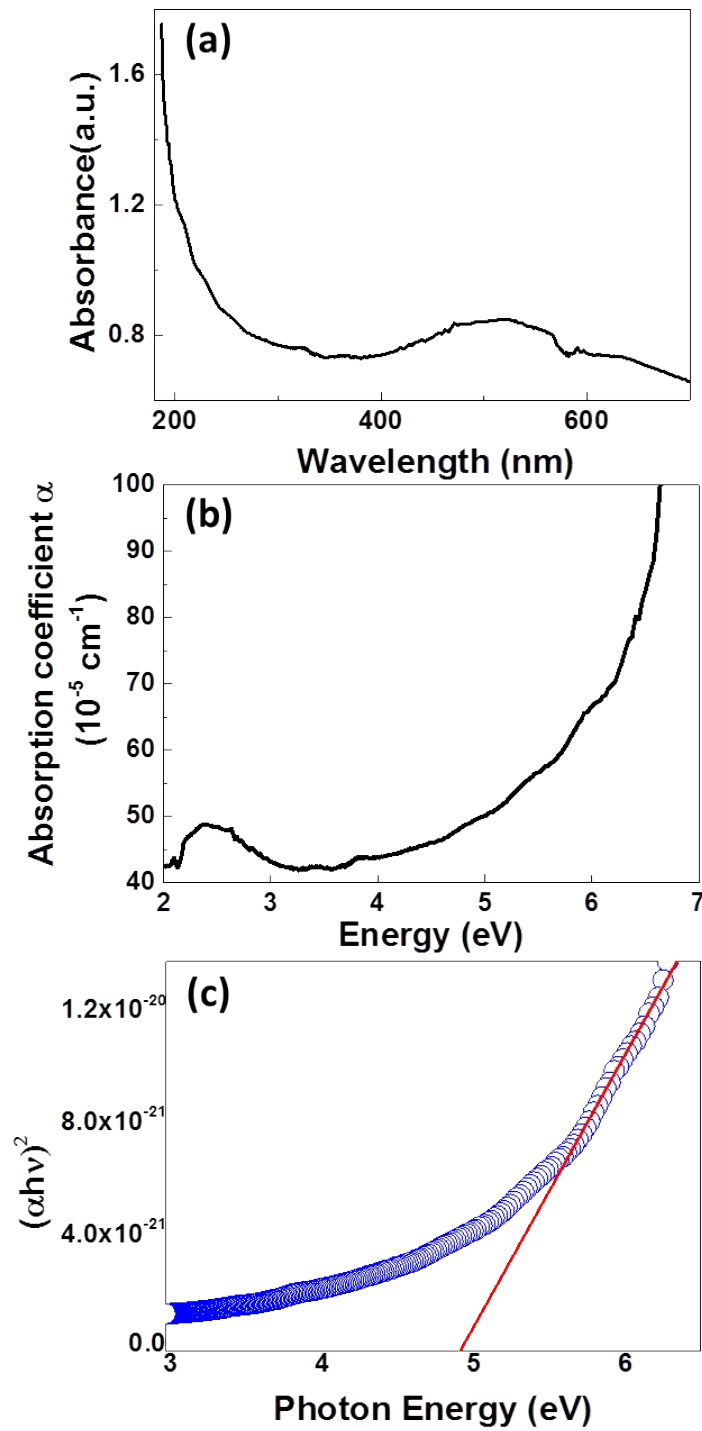

**Figure S2** Optical properties of freestanding  $\beta\text{-Ga}_2\text{O}_3$  sample (a) absorbance spectrum (b) absorption coefficient (c) optical band-gap

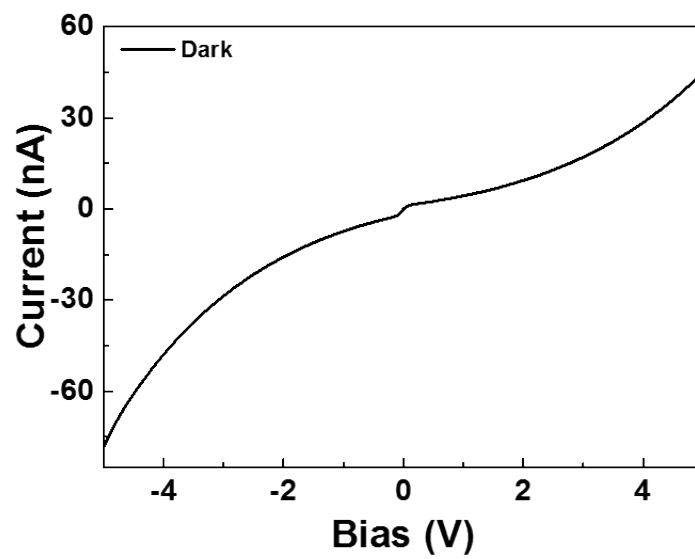

**Figure S3** Current-voltage characteristics between the Cr/Au electrodes deposited on  $\beta$ -Ga<sub>2</sub>O<sub>3</sub> microbelt

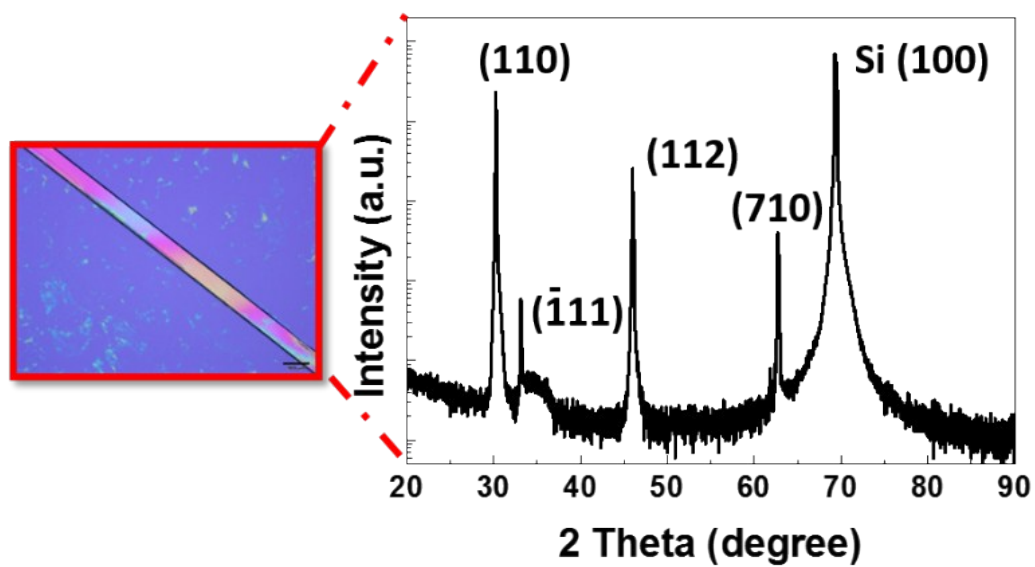

**Figure S4** XRD result from large  $\beta$ - $\text{Ga}_2\text{O}_3$  micro-belt on  $\text{SiO}_2/\text{Si}$  substrate
